# Supplementary material for: Development and Application of a QuEChERS-Based Liquid Chromatography Tandem Mass Spectrometry Method to Quantitate Multi-Component Alternaria Toxins in Jujube
Source: MDPI journal article supplement (doi:10.3390/toxins10100382), 2018-09-21
Supplement: s1 [file s1]

# Supplementary Materials: Development and Application of a QuEChERS-Based Liquid Chromatography Tandem Mass Spectrometry Method to Quantitate Multi-Component *Alternaria* Toxins in Jujube

Cheng Wang, Yingying Fan, Weizhong He, Dongqiang Hu, Aibo Wu and Wenliang Wu

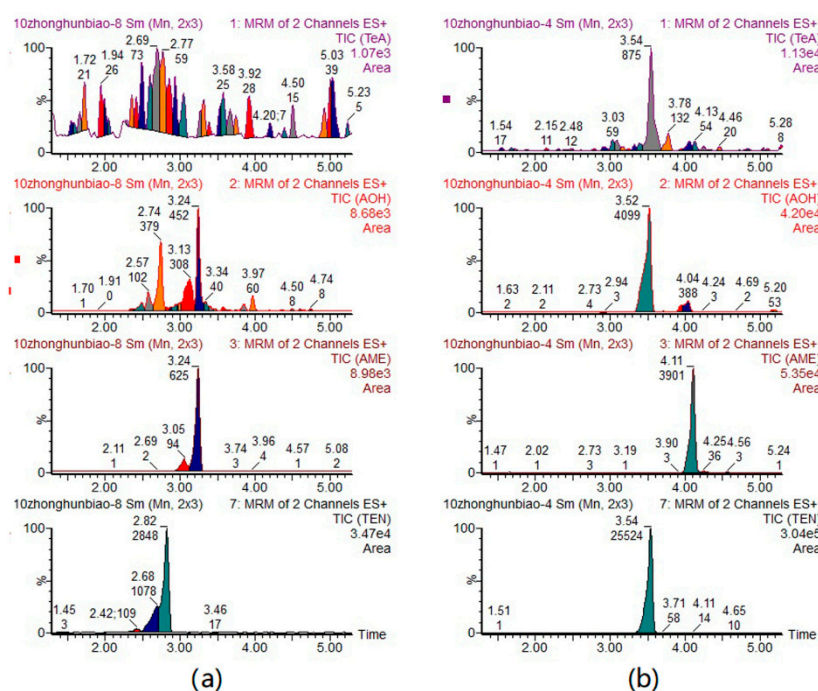

**Figure S1.** Optimization of chromatographic column for the four analytes. (a) Waters Acquity Ultra-Performance Liquid Chromatography (UPLC) Ethylene Bridged Hybrid (BEH) C18 column (1.8 μm, 2.1 × 100 mm); (b) Waters Acquity UPLC High Strength Silica (HSS) T3 column (1.8 μm, 2.1 × 100 mm).

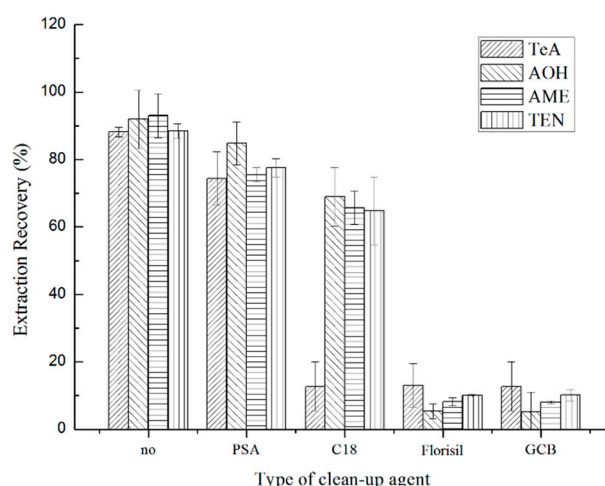

**Figure S2.** Effect of the type of clean-up agent on the extraction recoveries (ERs%) of four *Alternaria* toxins: tenuazonic acid (TeA), alternariol (AOH), alternariol monomethyl ether (AME), and tentoxin (TEN).

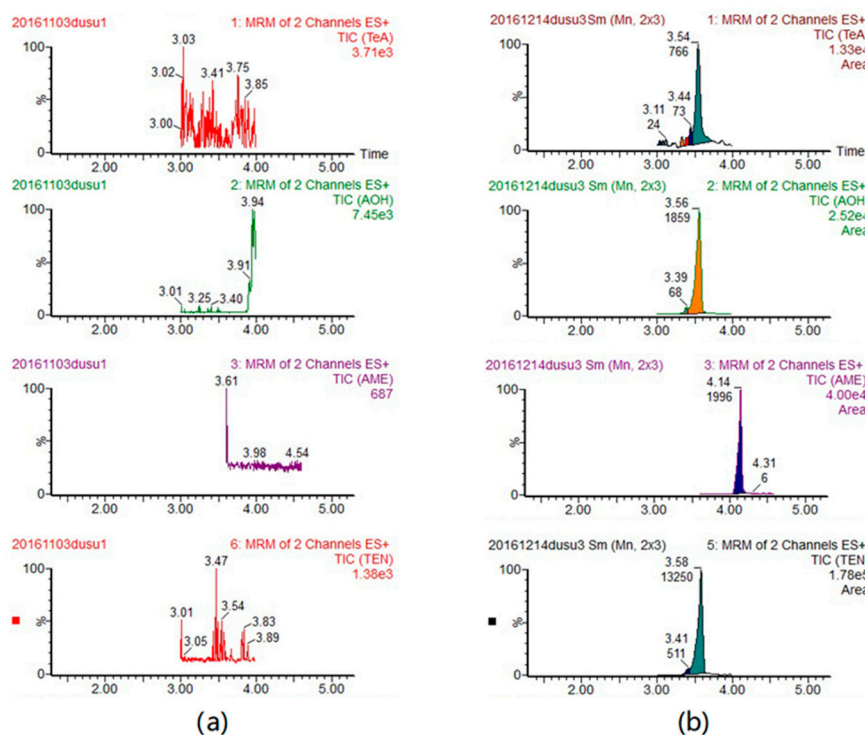

**Figure S3.** The UPLC-tandem mass spectrometry (MS/MS) chromatograms of the blank (a) and spiked (b) (80 µg kg<sup>-1</sup>) jujube sample (S-7).
